# **TITLE: Acute physical exercise of moderate intensity improves memory consolidation in humans via BDNF and endocannabinoid signaling**

## **Authors**

Blanca Marin Bosch<sup>1</sup>, Aurélien Bringard<sup>1,2</sup>, Maria Grazia Logrieco<sup>1</sup>, Estelle Lauer<sup>3</sup>,  
Nathalie Imobersteg<sup>1,2</sup>, Aurélien Thomas<sup>3,4</sup>, Guido Ferretti<sup>1,2</sup>, Sophie Schwartz<sup>1,5,6\*</sup>,  
Kinga Igloi<sup>1,5,6\*</sup>

**Affiliation:** (1) University of Geneva, Faculty of Medicine, Department of Neuroscience, Rue Michel-Servet 1, Geneva, Switzerland, 1206 (2) Hopitaux Universitaires Genève, Anesthesiology, Pharmacology and Intensive Care Department, Rue Gabrielle-Perret-Gentil 4, Geneva, Switzerland, 1205 (3) Unit of Toxicology, CURML, Lausanne University Hospital, Geneva University Hospitals, Rue Michel-Servet 1, 1211 Geneva (4) Faculty of Biology and Medicine, University of Lausanne, Chemin Vulliette 4, 1000 Lausanne (5) University of Geneva, Swiss Center for Affective Neurosciences, Chemin des Mines 9, Geneva, Switzerland, 1202 (6) University of Geneva, Geneva Neuroscience Center, Rue Michel-Servet 1, Geneva, Switzerland, 1206 .

**Contact information:** kinga.igloi@unige.ch

\* The last two authors contributed equally to this manuscript

## Abstract

Regular physical exercise enhances memory functions and synaptic plasticity in the hippocampus, an effect partially mediated by BDNF (Brain Derived Neurotrophic Factor). Acute exercise promotes the release of endocannabinoids (especially anandamide, AEA), which enhance BDNF release and improve hippocampal plasticity in rodents. How acute exercise affects BDNF and AEA levels and influences memory performance in humans remains to date unknown. Here we combined blood biomarkers, behavioral and fMRI measurements to assess the impact of acute physical exercise on associative memory and underlying neurophysiological mechanisms. For each participant, memory was tested after three conditions: rest, moderate or high exercise intensity. A long-term memory retest took place 3 months later. At both test and retest, memory performance increased after moderate but not high intensity exercise or rest. We also show that memory after moderate intensity exercise benefited from exercise-related increases in both AEA and BDNF levels: AEA boosted hippocampal activity during memory recall, while BDNF enhanced hippocampal memory representations and long-term performance.

## Introduction

Physical exercise is a lifestyle factor that boosts neurocognitive functions and brain plasticity<sup>1</sup> at all ages, and may possibly reduce the risk of cognitive decline associated with Alzheimer's disease<sup>2</sup>. Studies in animals support that voluntary regular exercise besides increasing plasticity also fosters neurogenesis in the adult hippocampus and improves learning and memory capacities<sup>3, 4</sup>. Adult neurogenesis in the human hippocampus has been repeatedly suggested<sup>5, 6, 7, 8</sup>, albeit being

recently questioned<sup>9</sup>. Several lines of evidence converge to suggest that these effects are mediated at least in part by the brain derived neurotrophic factor (BDNF), which contributes to hippocampal synaptic plasticity<sup>10, 11</sup>. Specifically, physical exercise increases the levels of BDNF mRNA and protein in the hippocampus and other brain regions<sup>11, 12, 13, 14, 15</sup>, and blocking BDNF action in the hippocampus hinders the beneficial effect of exercise on memory<sup>16</sup>.

Most human studies focus on the long-term effects of exercise on BDNF and cognition. Yet, measuring BDNF levels before and after a period of regular physical training cannot account for the dynamic time course of growth factor upregulation, which is thought to be fast and transient<sup>17, 18</sup>. In particular, BDNF levels are known to rapidly increase in hippocampal subfields in response to exercise<sup>14, 15</sup>, together with enhanced long-term potentiation (LTP) and synaptic plasticity<sup>19, 20, 21</sup>. These effects may mediate memory enhancement on the timescale of a few hours<sup>22</sup>. Associated with LTP induction, exercise also rapidly affects fine cell morphology, especially by increasing the number and size of hippocampal dendritic spines considered to support changes in synaptic strength<sup>23, 24, 25</sup>.

In addition, physical exercise increases serum concentrations of endocannabinoids, which act on cannabinoid receptors CB1 and CB2<sup>26, 27, 28, 29</sup>. Work in animal models implicates endocannabinoid signaling in exercise-induced adult hippocampal neurogenesis<sup>30, 31</sup> and plasticity mechanisms<sup>32</sup>. Endocannabinoids directly mediate different forms of retrograde plasticity<sup>33</sup> and can also modulate non-endocannabinoid-mediated forms of plasticity including LTP<sup>34</sup> and BDNF signaling<sup>35, 36</sup>. One recent study directly linked endocannabinoid system to memory enhancement and hippocampus function in mice by showing that blocking CB1 receptor in the hippocampus disrupts spatial memory performance whereas artificially

elevating endocannabinoid concentrations in sedentary animals increases BDNF levels and memory<sup>37</sup>.

Short periods of exercise, or acute exercise, were found to yield modest positive effects on learning, memory, and cognition in humans<sup>38</sup>, although existing studies report a wide range of effects, from positive to detrimental<sup>1, 38, 39, 40, 41</sup>. It is important to note that most of these studies used between-subjects comparisons with physical exercise performed at various intensities or durations, which may partly explain disparate outcomes<sup>42</sup>. Getting a better understanding of the relevant underlying neural mechanisms may help resolve these apparent inconsistencies while informing design efficient prevention programs.

In a previous behavioral study, we showed that moderate intensity exercise boosted associative memory performance<sup>41</sup>. The main aims of the present study were (i) to confirm these effects using an individually-defined measure of moderate physical effort (corresponding here to cycling during 30 minutes at 65% of the maximal cardiac frequency measured during VO<sub>2</sub>max), and (ii) to unravel the underlying blood biomarker and neuroimaging correlates. Based on animal data (reviewed above), we hypothesized that endocannabinoids and BDNF influence hippocampal functioning after acute physical exercise in humans. Different exercising intensities have been used in previous work, but rarely compared and often poorly characterized. We therefore added an exploratory high intensity exercising condition to clarify whether the beneficial effects of exercise on memory performance are specific to moderate intensity or may also be observed for a high exercising intensity. During the high intensity condition participants cycled during 15 minutes at 75% of their maximal cardiac frequency, which corresponds to an effort level above the ventilatory threshold. We tested nineteen participants using a cross-over randomized

within-subjects design. We used a hippocampus-dependent associative memory task<sup>41, 43</sup> in which participants learned 8 series of 6 successive pictures. The participants first saw the eight series once during the encoding session (**Figure 1B**), followed by a 2-alternative forced choice learning session with feedback during which participants successively selected the next picture in the series among two presented pictures (**Figure 1C – right panel**). To assess the influence of different intensities of physical exercise, we tested the memory for these series following a moderate intensity exercise session, a high intensity exercise session or a rest period in a within subject design. Blood samples were taken before and after each period of exercise or rest. The memory task consisted in an associative memory task on pairs of pictures with different relational distances (direct, inference of order 1 and order 2). They were presented with one picture and were then asked which one among two pictures was part of the same series as the first picture (while the other picture belonged to a different series) (**Figure 1C**). Sixteen control trials were also included in which the depicted elements were of a given color (red, blue or green) and participants had to choose among two pictures which one was of the same color as the target picture. Functional MRI (fMRI) data was acquired during all experimental sessions and analyzed using SPM12 (see Methods). We also tested the effects of acute physical exercise on long-term memory during a surprise memory retest 3 months after the last experimental visit (see **Figure 1A**). In line with our previous results<sup>41</sup>, we hypothesized that moderate intensity exercise would yield the largest benefits, especially at immediate test. Further, we expected that such memory benefits would be associated with exercise-related changes in BDNF and AEA levels. AEA is known to have transient effects due to its rapid degradation by metabolic enzymes<sup>44</sup> whereas the reported effects of BDNF are generally long-lasting<sup>5</sup>. We

therefore predicted that increases in BDNF levels may underlie long-term memory effects.

## Results

### Learning

Hit rates and efficiency (i.e. hit rate divided by reaction time) were analyzed using a repeated measure ANOVA with Learning Blocks (block 1, block 2, block 3) and Visit theme (office, shoe shop, house) as within-subjects factors. Both analyses revealed a main effect of Block (hit rate:  $F(2, 36)=26.40$ ,  $p<0.001$ ; efficiency:  $F(2, 36)=19.66$ ,  $p<0.001$ ), consistent with a progressive learning of the associations, but no effect of Visit theme (hit rate:  $F(2, 36)=0.62$ ,  $p=0.54$ ; efficiency:  $F(2, 36)=0.07$ ,  $p=0.93$ ) and no interaction (hit rate:  $F(4, 72)=0.36$ ,  $p=0.84$ ; efficiency:  $F(4, 72)=0.91$ ,  $p=0.46$ ). Importantly, there was no main effect and no interaction with subsequent physical exercise neither for hit rate nor for efficiency (all  $p>0.05$ ) when this factor was added as repeated measure to the previous ANOVA. Overall, during the third block, participants reached a high level of performance (hit rate  $\pm$  standard error:  $86.97 \pm 1.56\%$ ), suggesting a good encoding of the series, well above chance level.

### Test

To test our main prediction and provide a replication of our previous behavioral findings<sup>41</sup>, hit rate and efficiency data from the test session were first analyzed using two repeated measures ANOVAs to compare moderate intensity exercise to rest with Exercising Condition (rest and moderate intensity exercise) as repeated measures and Relational Distance (direct, inference 1, inference 2) as within-subjects factor. We report a main effect of Exercising Condition for both hit rate ( $F(1, 54)=4.47$ ,  $p=0.04$ ) and efficiency ( $F(1, 54)=4.03$ ,  $p=0.049$ ) and no effect of Relational Distance

and no interaction (all  $p > 0.05$ ) - **Figure 2A**. Including high intensity as Exercising Condition into these ANOVAS the effect of Exercising Condition on hit rate becomes a trend ( $F(2, 108) = 2.09, p = 0.12$ ), while the effect on efficiency remains ( $F(2, 108) = 5.27, p < 0.01$ ). We still report no effect of Relational Distance or interaction between both factors (all  $p > 0.05$ ). Post-hoc analyses revealed that participants performed better in the moderate than in the rest and in the high Exercising Condition ( $p_{\text{mod-rest}} = 0.03, p_{\text{mod-high}} < 0.01$ ). Taken together, these results indicate that moderate exercise offers a favorable condition for memory consolidation processes.

To test for possible effects of Visit Theme and learning across visits we performed two additional repeated-measures ANOVAs, one with Visit Theme (offices, shoes, kitchens) as repeated measure and the second with Visit Number (first, second, third) as repeated measure and for both ANOVAs we included Relational Distance (direct, inference 1, inference 2) as within-subject factor. We report no effect of Visit Theme ( $F(2, 108) = 0.56, p = 0.57$ ) and no effect of Visit Number ( $F(2, 108) = 1.04, p = 0.36$ ), and as for previous analyses there was no effect of Relational Distance and no interaction effect (all  $p > 0.05$ ).

## Blood samples

Blood samples were taken right before and after the rest and exercise sessions. The first blood sample served as a baseline measure (this is especially important for endocannabinoid measures, which are known to substantially fluctuate according to diet and other environmental factors). The values reported here were obtained for each visit by subtracting the first blood sample (baseline measure) from the second blood sample. Repeated-measures ANOVAs were performed for each biomarker that was measured with Exercising Condition (rest, moderate, high) as within-subjects

factor. Additionally, to investigate the relationship between biomarkers and test performance, we z-scored efficiency and biomarker values and entered these values into a repeated-measures ANOVA with Exercising Condition (rest, moderate, high) and Factor (efficiency, BDNF and AEA) as parameters. As we have seen no effect of Relational Distance in previous analyses, we did not separate the data according to this parameter.

For the endocannabinoid Anandamide (AEA), a main effect Exercising Condition ( $F(2, 36)=8.30$ ,  $p<0.01$ ; **Figure 3A**) was found. Post-hoc analyses revealed that all Exercising Conditions differed significantly from each other (all  $p<0.05$ ). For the endocannabinoid 2-Arachidonoylglycerol (2-AG), there was no effect of Exercising Condition ( $F(2, 36)=3.2289$ ,  $p>0.05$ ), consistent with previous descriptions in the literature <sup>27</sup>. Please note that AEA during the rest condition decreased from the first (baseline) to the second (post-rest) measurement, hence resulting in a negative differential value. This decrease is consistent with known circadian fluctuations in AEA, whereby AEA levels increase during sleep and decrease throughout the day <sup>45</sup>. For the Brain Derived Neurotrophic Factor (BDNF), we report a main effect of Exercising Condition ( $F(2, 36)=4.6$ ,  $p=0.02$ ; **Figure 4A**). Post-hoc analyses revealed that, as for AEA, all Exercising Conditions differed significantly from each other (all  $p<0.05$ ). For the between Factors ANOVA combining biomarker and performance measures, we report a main effect of Exercising Condition ( $F(2, 108)=48.20$ ,  $p<0.001$ ) and an interaction effect between Exercising Condition and Factor ( $F(4, 108)=14.78$ ,  $p<0.001$ ) suggesting that biomarkers and efficiency are affected differentially by Exercising Condition with moderate intensity exercise being associated with highest efficiency (post-hoc for efficiency  $p_{\text{mod-rest}}<0.001$ ,  $p_{\text{mod-high}}<0.001$ ) and an intermediate biomarker increase (joint effect for BDNF and AEA



post-hoc  $p_{\text{mod-rest}} < 0.001$  and  $p_{\text{mod-high}} = 0.02$ ) whereas high intensity exercise is associated with the highest biomarker increase (see above post hoc) but with an efficiency comparable to the rest condition ( $p_{\text{high-rest}} > 0.05$ ). Overall this analysis is in favor an inverted U-shape hypothesis for both biomarkers with intermediate measures yielding highest performance.

To verify that individual fitness levels did not significantly affect our main results, we tested whether behavioral performance and biomarker levels correlated with VO2max measures, but found no correlation ( $p > 0.05$ ). Further separating our sample into two groups using a median split in VO2max measures did not show any difference in behavioral or biomarker measures either.

## **Psychomotor vigilance test (PVT) and Profile of Mood States questionnaire (POMS)**

Both PVT and POMS were performed just before the MRI test session. This was more than half-an-hour after the end of the exercising/rest period when heart rate and other physiological measures were back to baseline. The PVT and POMS were used to monitor possible condition-dependent differences in vigilance and mood at the time of the test session<sup>46</sup>. For PVT, we replicate our previous results<sup>41</sup> showing no difference in PVT as a function of Exercising Condition (rest, moderate, high), neither in mean or median reaction times, number of lapses, or number of false alarms (one way repeated measures ANOVAs, all  $p > 0.05$ ). This suggested that participants did not significantly differ in vigilance state 30 minutes after rest or physical exercise. For POMS, we report no difference for any of the measured categories (fatigue, tension, confusion, vigor) as a function of Exercising Condition (all  $p > 0.05$ ), suggesting that the physical exercise sessions did not result in lasting mood changes.

## Heart rate and breathing analysis

During the rest period participants' heart rate was at 34.4 $\pm$ 3.9% of their maximal heart rate as assessed by the VO<sub>2</sub>max procedure (see Methods). During moderate and high intensity physical exercise, participants pedaled at 68.7 $\pm$ 1.1 % and 77.7 $\pm$ 1.8% of their maximal heart rate, respectively. One way repeated-measures ANOVA revealed a significant difference in heart rate between the 3 Exercising Conditions (rest, moderate, high intensity exercise;  $F(2, 36)=1865.7$ ,  $p<0.001$ ). Post-hoc analyses confirmed that the three Exercising Conditions differed from each other (all  $p<0.001$ ). We also recorded heart rate during the test part and found no difference in heart rate as a function of the Exercising Condition (all  $p>0.05$ ), suggesting that all participants' heart rate was back to baseline at test (i.e., at least 60 min after the completion of the exercise session).

## Functional MRI results

We first performed standard general linear model analysis with data collected after rest, moderate intensity exercise, and high intensity exercise modelled as separate sessions. Within each session, we considered correct trials according to Relational Distance (direct, inference 1, inference 2) and control trials as four separate regressors of interest, and included incorrect trials as an additional regressor. When comparing high Relational Distance to low Relational Distance (inference 2 > direct trials) across all sessions, we found increased activity in the right hippocampus [ $z$  score=3.64 (18, -38, -8),  $p<0.05$  SVC], bilateral parahippocampal gyrus and precuneus (see **Supplementary Figure 1**, and **Table 1** for exhaustive list of activations). No region was activated (at a threshold of 0.001 unc.) when comparing inference 1 to direct trials, and inference 2 to inference 1 trials. Comparisons

between Exercising Conditions and interactions between Relation Distance and Exercising Conditions did not yield any significant activation either.

As it is known that AEA has a rapid effect on synaptic plasticity in the hippocampus, we tested whether the observed difference in AEA across Exercising Conditions might exert a modulating influence on brain activity. We thus added individual AEA change as a cofactor in the second-level analyses comparing Exercising Conditions. We found that the increase in AEA after moderate intensity exercise (vs. rest) correlated with the activation in the right hippocampus [z-score=3.89 (38, -14, -20),  $p < 0.05$  SVC], **Figure 3B**. A similar modulation of hippocampal activity was found for high intensity exercise (vs. Rest) [z-score=3.41 (32, -22, -20),  $p < 0.05$  SVC], suggesting that AEA increase correlates robustly with hippocampal activation, **Supplementary Figure 2**.

A decoding approach was used to test whether exercise would affect the classification of single trials (correct, incorrect, or control trials as in Van Dongen et al.<sup>38</sup>; see Methods section) from activity within the bilateral hippocampus region. For a classification with 3 possible outcomes, chance level was at 33.33%. We performed an ANOVA on classification accuracy with Trial Type (correct, incorrect, control) and Exercising Condition (rest, moderate, high) as factors. We observed an effect of Trial Type ( $F(2, 36)=25.70$ ,  $p < 0.001$ ) and an interaction between Exercising Condition and Trial Type ( $F(4, 72)=2.80$ ,  $p=0.03$ ). Correct trials were better classified in the moderate condition ( $F(2, 36)=19.79$ ,  $p < 0.001$ ), while there was no effect of Exercising Condition for the control trials and incorrect trials ( $p=0.19$  and  $p=0.74$  respectively). Focusing on correct trials, we report that decoding accuracy was above chance level after moderate intensity exercise, but at chance level after rest and high intensity exercise (**Figure 4B**). Post-hoc analyses further showed that decoding after

moderate intensity exercise was higher than after both rest and high intensity exercise ( $p_{\text{mod-rest}} < 0.001$ ,  $p_{\text{mod-high}} < 0.001$ , depicted on **Figure 4B**). Similar results were obtained when performing decoding from activity in the left and in the right hippocampus separately, with better decoding accuracy after moderate exercise than rest or high intensity exercise (see **Supplementary Figure 3**).

Because decoding was done in the hippocampus and BDNF is known to specifically enhance plasticity mechanisms in the hippocampus, we tested for a relationship between these two variables. We report a positive correlation between BDNF enhancement during moderate intensity exercise (calculated as the difference between moderate and rest BDNF values, with baseline values subtracted for each visit) with decoding accuracy after moderate intensity exercise ( $R=0.57$ ,  $p=0.01$ ), **Figure 4C**.

### Retest

Long-term memory was assessed in a retest session three months later. Eighteen subjects came back for the retest session. Retest was similar to the test sessions but it comprised a subset of trials from all three experimental visits (see Methods section). For the analysis of the retest session, trials were not separated according to Relational Distance as no behavioral effect related to this was previously found. A repeated-measure ANOVA was performed with Exercising Condition (rest, moderate, high) as within-subjects factor, that revealed a main effect of Exercising Condition ( $F(2, 34)=3.32$ ,  $p=0.048$ ). Post-hoc analyses showed that participants performed better after moderate Exercising Condition than after rest ( $p_{\text{mod-rest}}=0.04$ ; no other comparison was significant); **Figure 5A**. We also assessed whether participants performed above chance level during each of the three Exercising Conditions and

only the trials learnt during the moderate exercise condition were remembered above chance level three months later ( $t(17)=2.31$ ,  $p=0.03$ ).

We asked whether physical exercise had some long-term effects on the functional coupling between the hippocampus and other brain regions during the processing of associative memories. A psychophysiological interaction analysis was performed (see Methods) taking as seed region the right hippocampal activation for moderate intensity vs. rest correlated with the AEA increase reported above (38, -14, -20) and we report that the left superior frontal gyrus [ $z$ -score=3.16 (-16, 62, 6),  $p<0.001$  unc.] showed such pattern of increased functional connectivity for associations learnt during the moderate intensity exercise condition (compared to the Rest) session (**Figure 5B**).

We also hypothesized that changes in BDNF after the moderate intensity exercise condition may have long-lasting effects on neurogenesis and synaptic plasticity, potentially increasing long-term memory retention. This hypothesis was tested by correlating changes in BDNF levels after moderate intensity (vs. after rest) to delayed performance increase (i.e., from test to retest) for moderate vs. rest Exercising Condition. We report a significant positive correlation ( $R=0.47$ ,  $p=0.04$ ) see **Figure 5C**, while the same correlation for high intensity exercise was not significant ( $R=0.005$ ,  $p=0.98$ ). These results suggest that BDNF increase after moderate intensity exercise may contribute to memory enhancement.

## Discussion

We show here that one session of moderate intensity physical exercise but not high intensity physical exercise enhances associative memory, both at immediate

test (2 hours after encoding) and at long-term retest (three months later). These effects may be mediated by the endocannabinoid AEA and the growth-factor BDNF, whose respective concentrations increased after acute exercise. Accordingly, during the short-term test, the increase in serum AEA concentration correlated with hippocampal activity when associative memories were recalled, and BDNF increase correlated with decoding measures within the hippocampus. Moreover, BDNF increase during moderate intensity physical exercise correlated with better performance at long-term retest. Overall, we show that acute physical exercise at moderate intensity has long-lasting positive effects on the consolidation of associative memories in healthy young human adults. Below, we discuss the neurophysiological mechanisms that could explain these important findings.

## **Biomarker mechanisms underlying the effects of acute exercise on hippocampal plasticity**

In a recent study in rodents, Fuss et al.<sup>47</sup> demonstrated that physical exercise induces an acute increase of AEA measured in the plasma, with direct effects on CB1 receptors in the brain. Note that in the same study cerebro-spinal fluid measures did not capture increases in AEA, consistent with AEA being very rapidly metabolized in the brain<sup>44</sup>. These results support the fact that plasma measures of AEA, as we performed here, may reflect the effect of AEA on the brain. Another rodent study directly linked endocannabinoid signaling to hippocampal memory function, by showing that selectively blocking CB1 receptors in the rodent hippocampus abolished exercise-induced memory effects<sup>37</sup>. This study also demonstrated that artificially increasing AEA concentrations (by blocking the Fatty Acid Amine Hydrolase (FAAH), the enzyme responsible for breaking down AEA) in the hippocampus of sedentary mice mimicked the effects of physical exercise and increased memory performance.

Together, these rodent studies illuminate the neurophysiological mechanisms underlying our novel finding that AEA increase in human plasma may reflect direct effects on brain activity, especially in the hippocampus.

Traditionally, BDNF has been linked to effects of regular physical exercise, although it is known that BDNF gene expression is upregulated both after acute and after chronic physical exercise in rodents<sup>48</sup>. Here we show that the effects of one single session of exercise may differentially affect both short and long-term. On the one hand, BDNF increase after acute physical exercise correlated positively with decoding accuracy of memory items in both hippocampi immediately after exercise (test session). On the other hand, BDNF increase also correlated with long-term memory increase between Exercising Conditions (retest session), suggesting that those participants who exhibited larger increases in BDNF levels at test remembered the learnt association better at retest three months later.

How can we explain that an acute modulation of BDNF levels affects memory? It is widely acknowledged that BDNF enhances synaptic plasticity, especially via LTP<sup>22</sup>, which can be induced in a few minutes and critically contributes to memory consolidation<sup>49</sup>. BDNF facilitates LTP by activating signaling pathways (including MAPK and Akt)<sup>50</sup>, promoting cytoskeleton changes<sup>51</sup>, and enhancing protein synthesis required for vesicle trafficking and the release of neurotransmitters<sup>52</sup>. Several studies have now confirmed that physical exercise, both per se and via BDNF signaling, boosts LTP<sup>20, 22</sup> via glutamatergic NMDA receptor activation. Indeed, on the one hand, physical exercise increases the expression of both NR2A and NR2B subtypes of the NMDA receptor in the hippocampus<sup>21, 48</sup> while, on the other hand, BDNF modulates the activity of NMDA receptors at hippocampal synapses<sup>53</sup>. Studies in rodents have repeatedly shown that increasing NMDA-

receptor mediated plasticity is crucial for associative memory acquisition and consolidation<sup>54, 55</sup>. In our experimental design, inducing LTP in the hippocampus (through exercise) after the encoding of new associations likely strengthens memory representations and consolidation, hence affecting pattern completion in the hippocampus for example<sup>56</sup>.

## **Effect of exercise intensity**

While characterizing the impact of exercise intensity on cognitive functions is critical for health recommendations, dementia prevention programs and rehabilitation strategies, the reported effects remain inconsistent. Some studies suggest that high intensity training is most efficient<sup>38, 40</sup> while other studies, especially meta-analyses, indicate that moderate exercise might have more impact<sup>39</sup>. Here we aimed at clarifying this important issue by using a cross-over randomized within-subjects design according to which each participant was tested at a moderate and at a high intensity (plus a resting, baseline condition) across distinct sessions where associative memory was also tested. Importantly, here we determined moderate and high intensity exercise levels, with reference to each participant's ventilatory threshold. This threshold measured using a VO<sub>2</sub>max procedure (see Methods), which is a gold-standard in human physiology research see <sup>57</sup> for review. Moderate intensity corresponded to exercise below the ventilatory threshold (about 60-65% of individual VO<sub>2</sub>max) and high intensity corresponded to exercise above the ventilatory threshold (about 75% of individual VO<sub>2</sub>max). Here we found that the beneficial effects of moderate intensity exercise on memory are strong, showing a clear difference compared to rest, while the effects of high intensity exercise appear to be more complex. Because high intensity exercise is a more stressful physiological condition, it may disrupt memory consolidation processes. Some evidence suggests



that while aerobic exercise training (i.e. below ventilator threshold) is beneficial for hippocampal functioning, high intensity training is not<sup>58</sup>. One plausible mechanism is that high intensity exercise induces a large cortisol increase during exercise which can impair memory for previously learnt stimuli<sup>59, 60</sup>. Another concern relates to the definition of intensity, which is far from being consistent across studies, especially considering different forms of exercise performed (rowing compared with cycling or running), as highlighted in a recent meta-analysis<sup>61</sup>. In the few studies where different exercise intensities were compared, some evidence suggests that moderate activity may be associated with lower risks for cerebrovascular events (hemorrhagic and ischemic) than strenuous physical exercise<sup>62</sup>. Further, intense exercise may have detrimental effects particularly in the presence of cerebrovascular and metabolic risk factors<sup>63</sup> or increased risk for Alzheimer's disease<sup>64, 65</sup>. In this article, rather than concentrating on the clear-cut positive results between moderate intensity exercise and rest, we decided to present the findings from both intensities and carefully discuss the possible reasons for the differential effects of moderate and high intensity exercise. We hope that our results and the ideas raised in our discussion will fuel future debates and investigations in the scientific community.

Here we observed that moderate levels of exercise intensity increased both BDNF and AEA levels and optimized cognitive processes. By contrast, although high intensity physical exercise further increased the measured concentrations of BDNF and AEA, performance did not follow this increase. This observation suggests that large increases in BDNF and AEA concentrations might not be as beneficial for memory performance. In line with this hypothesis, Mamounas et al.<sup>66</sup> showed that the BDNF dose-response curve follows an inverted U-shape with intermediate concentrations of BDNF yielding best results for sprouting of serotonergic neurons

in the rodent hippocampus. For AEA, one study using exogenous AEA administration suggested that related anxiolytic effects also follow an inverted U-shape dose-response curve with highest concentrations (measured in the periaqueductal gray) being less effective<sup>67</sup>. The main findings of the present study provide further support for intermediate concentrations of both molecules having a maximal effect on neurocognitive functions, here for hippocampal-dependent memory formation. Of course, we cannot exclude that other biomarkers may also contribute to the observed effects, such as for example a large increase in cortisol after high intensity exercise, which may be detrimental for memory consolidation<sup>59, 60</sup>.

## **Immediate and lasting effects of physical exercise**

Lasting effects of physical exercise are established for regular physical exercise protocols, involving several months of training<sup>5, 68, 69</sup>. Many of these protocols focus on the possible protective effect of physical exercise in ageing and dementia. On the other hand, acute physical exercise has been reported to have positive short term cognitive effects<sup>38, 41</sup>, albeit not always found in tasks involving hippocampus-dependent memory<sup>42</sup>. Long-term effects of acute physical exercise (at the scale of several months as we tested here) have to our knowledge not been investigated in humans so far. Here we found long-lasting effects on memory retention selectively for moderate intensity exercise (i.e. below the ventilatory threshold).

## **Possible confounding factors due to fatigue or carry-over effects of exercise**

Fatigue and reduced vigilance are known to affect cognitive performance. We sought to minimize any potential effect of exercise-related fatigue (i) by scheduling the test part of the protocol 1 hour after the end of the physical exercise session; (ii) by including only participants who were exercising regularly and whose VO<sub>2</sub>max

levels were above 40ml/kg/min, so that exercise intensity and duration would not be exhausting for them. We also specifically measured fatigue and vigilance level in our participants and found that neither POMS scores for fatigue nor PVT did differ after moderate or high intensity exercise. We also checked that heart rate and breathing rhythm of all our participants were back to baseline levels when the test session started. Nevertheless, to exclude any contaminations of heart rate or breathing on our fMRI data, we carefully regressed out these effects using Retroicor<sup>70</sup> and RVHcorr<sup>71, 72</sup>.

## Conclusion

We show that acute moderate but not high intensity physical exercise significantly increased associative memory performance both at short and long term. At short term, hippocampal activation correlated with endocannabinoid AEA while enhanced hippocampal memory representations were associated with a modulation of BDNF. At long term, three months after encoding, memory effects were related to BDNF increase induced by moderate intensity exercise. We conclude that a single session of moderate physical exercise boosts associative memory formation.

## Methods

### Participants

For the present experimental design, we estimated the required sample size based on the results from our previous study<sup>41</sup>. The latter was performed on an independent sample of participants and using the same associative memory task with a similar within-subject design, where we found a significant behavioral effect of

moderate intensity exercise on memory performance (14 participants,  $F(1,13)=17.27$ ,  $p=0.001$ ). Using the effect size from that previous study (Cohen's  $d=0.53$ ) with an alpha level at 0.05 and power (1-beta) of 0.80, we derived an overall sample size of 15 for a two-tailed dependent-sample t-test. We included twenty healthy young male volunteers in this study, who gave written informed consent and received financial compensation for their participation, which was approved by the Ethics Committee of the Geneva University Hospitals. One participant had to be excluded from all the analysis for non-compliance with experimental requirements. The remaining 19 participants were between 18 and 34 years old (mean age  $\pm$  standard error :  $23.03 \pm 0.92$  years). All participants were right-handed, non-smokers, free from psychiatric and neurological history, and had a normal or corrected-to-normal vision. They were within the normal ranges on self-assessed questionnaires for depression (BDI<sup>73</sup>), anxiety (STAI<sup>74</sup>), circadian typology (PSQI<sup>75</sup>, and reported exercising regularly (at least twice per week). We only included participants whose VO<sub>2</sub>max was above 40ml/kg/min and below 65ml/kg/min, see **Supplementary figure 4** for the distribution of VO<sub>2</sub>max measures. The lower bound was used to ensure that participants would tolerate the high intensity condition. The upper bound was needed for a homogeneous high intensity exercise condition above the ventilatory threshold (which corresponds in a cycling paradigm to about 70% of maximal cardiac frequency for moderately fit participants). In very highly trained participants, whose VO<sub>2</sub>max is above 65ml/kg/min, the ventilatory threshold is often higher, at about 90% of maximal cardiac frequency (or 80% of VO<sub>2</sub>max). Thus, an intensity defined as 75% of VO<sub>2</sub>max would not correspond to comparable difficulty levels for moderately fit vs. highly trained participants.

## Experimental procedure

Participants first came to the lab for a VO<sub>2</sub>max procedure. During this visit, participants also performed a habituation session of the associative task. Those participants with a VO<sub>2</sub>max within the required ranges (see above) were invited to come back for three experimental visits separated by one to two weeks, according to a within-subjects design with the three Exercising Conditions (rest, moderate intensity exercise, high intensity exercise) counterbalanced across participants. Participants were asked to keep a regular exercising schedule during at least 5 days before each visit. Compliance was documented by fitness tracker (Fitbit Charge HR, Fitbit, San Francisco, USA). Moreover, they were requested to refrain from intense physical activity for the 48h preceding the experimental visits.

For each visit, participants arrived at 08:00 AM on an empty stomach, and had breakfast consisting of coffee or tea, orange or apple juice, bread, and jam. Participants were allowed to eat as much as they desired but we controlled that they ate approximately similar amounts for all visits, they were allowed one caffeinated drink only. We did not allow them to eat any lipids to minimize inter-subject variability in endocannabinoid measures which heavily depend on lipid consumption.

At 09:00 AM, participants were comfortably installed in the scanner, and started the encoding part of the associative memory task (see below; **Figure 1A**) while fMRI data was acquired. At 09:50 AM a qualified medical doctor took a first blood sample. At 10:00 AM participants were equipped with a Polar RS800CX N device to measure heart rate and asked to rest or exercise. For the two exercise conditions, participants pedaled on a cycle ergometer (Ergoline GmbH, Bitz, Germany), the pedaling frequency was kept between 60 and 80 cycles per minute, which was shown on a small screen in front of the participant. For moderate intensity exercise, the load of the ergometer was defined so that the cardiac frequency of the participant would be

at 60% of his FcMax and the participant pedaled for 30 minutes. For high intensity, participants first warmed up for 2 minutes at 50% of FcMax then the load was progressively increased over 1 minute to reach 75% of FcMax. Participants pedaled at this intensity for 15 minutes then they pedaled again at 50% of FcMax for 3 minutes to cool down. For both exercise conditions the experimenters checked cardiac frequency every 3-5 minutes to adjust the resistance of the ergometer if necessary. For the rest condition, participants sat on a chair and were allowed to quietly look at magazines for 30 minutes. We carefully selected these magazines so that they were mainly composed of pictures, and that there was little to be learnt from their content to minimize interference with memory. We purposefully did not let participants watch a movie during rest to minimize motor imagery. At 10:30 AM, the medical doctor took a second blood sample and fifteen minutes after this, participants performed a Psychomotor Vigilance Task (PVT) followed by the Profile of Mood States (POMS) questionnaire. The POMS questionnaire is composed of 38 questions with 5 levels each: 0=not at all, 1= a little, 2=moderately, 3=quite a lot, 4=extremely. The POMS assesses tension, fatigue, vigor, confusion with 7 to 9 questions for each category and includes an additional 7 dummy questions. The POMS score for each category is the sum of the scores for the corresponding questions. These latter two measures were acquired as control measures to exclude that difference in fatigue and mood states may explain our memory findings so they were administered when heart rate and other physiological conditions were back to baseline, close in time to the second fMRI session when memory was tested.

At 11:30 AM, participants underwent a second fMRI session during which memory for the associative task was tested. A surprise retest fMRI session took place three

months later where participant's memory was tested again; no blood samples were taken at this time point.

**Associative memory task in fMRI:** We adapted an associative memory task<sup>41, 43</sup> consisting of two parts: encoding and test, separated by an exercise (moderate or high intensity) or rest period (**Figure 1A**). To avoid interference across experimental visits for this within subject design, we showed different pictures belonging to three specific themes at each visit: "office", "shoe shop" or "house" (one theme per visit). The pictures in each theme for the experimental visits were matched in difficulty and counterbalanced across Exercising Conditions and visits (**Figure 1B**). Note that for the habituation session of the task, participants had to memorize 5 series of a "swimming pool" theme.

During the encoding session, participants were first shown 8 series of 6 pictures once, one picture at a time (2000ms per picture), and were asked to encode each series as a whole (**Figure 1B**). Then, they were trained on the 8 series 3 times, i.e. during three successive learning blocks. For each series, participants were shown the first picture of the series alone (e.g., pen, for the "office" theme; **Figure 1B**) presented during 2000ms. Then, the same first picture was presented in the upper half of the screen together with two options for the second picture in the series (chair) in the lower half of the screen, one being the correct next picture and the other picture being from a different series (as depicted on the left panel of **Figure 1C**). Participants could not answer for 2000ms, then the sentence "choose the next element" appeared on the screen and participants were instructed to press a button to give their answer when they had made their decision. Participants had to select the correct next picture by pressing a left or right button. The correct picture was then shown (providing a feedback for each trial), followed by this same picture together

with the two next options for the third picture in the series (desk). This continued until the last picture in the series (office building). Additionally, two control series occurred pseudo-randomly during each block during which participants were shown a picture of a given color (red, green or blue) and had then to choose the picture of the same color (**Figure 1D**). During each learning block, all 8 memory series and 2 control series were shown once. All stimuli were designed and delivered using a MATLAB Toolbox (Cogent 2000, [http://www.vislab.ucl.ac.uk/cogent\\_2000.php](http://www.vislab.ucl.ac.uk/cogent_2000.php)).

During the test session, participants were presented with one cue picture and two other pictures, among which they had to select the one belonging to the same series as the cue picture. The two options could represent the immediate next item in the series (direct trials) or could be separated by one or two items from the cue picture (inference of order 1 or order 2 trials; **Figure 1C**). All types of trials were shown in a randomized order, and were presented in the same format and with the same timeframe as during learning, except that feedback was not provided. In this session 16 trials of the control “color” task were also included.

For the delayed retest session, 18 out of the 19 participants came back for a surprise retest in fMRI three months after the last experimental visit. Participants did not know at test that there would be a retest session. The task was identical to the test sessions, except that pictures of all three themes were now mixed in a random order. For time constraints, only half of the trials of each of the three test sessions were shown at retest, these trials were pseudo-randomly chosen from each series of pictures and included identical numbers of direct, inference 1 and inference 2 trials from each theme.



**Behavioral analysis:** We measured hit rate and reaction time for each trial and derived efficiency as hit rate divided by reaction time. Performance and efficiency were the main outcomes described in the results section. For the sake of completeness, we report here the analysis of reaction times in a repeated measures ANOVA with Trial Types (correct, incorrect and control trials) and Exercising Conditions (rest, moderate, high) as factors. This analysis showed an effect of Trial Type with reaction times for control trials being much faster than for correct trials which themselves were faster than incorrect trials ( $F(2, 32)=109.57$ ,  $p<0.001$ , mean of 509ms for control trials versus 1432ms for correct trials and 2124ms for incorrect trials) and there was no Exercising effect within any of the three Trial types ( $F(2, 36)=0.71$ ,  $p=0.50$  see **Supplementary Figure 5**). These results indicate that reaction times primarily reflect the time to make a decision, independently of the exercising condition.

**VO<sub>2</sub>max measure:** A maximal incremental test was performed during a preliminary visit to the laboratory, using an electrically braked cycle ergometer (Ergometrics er800S, Ergoline, Jaeger, Germany). Respiratory gas flows and ventilation were continuously measured at the mouth on a breath-by-breath basis, using a metabolic unit (K4b<sup>2</sup>, Cosmed, Italy), consisting of a Zirconium Oxygen analyzer, an infrared CO<sub>2</sub> meter and a turbine flowmeter. As recommended by the manufacturer, the gas analyzers were calibrated with ambient air and with a mixture of known gases (O<sub>2</sub> 16 %, CO<sub>2</sub> 5 %, N<sub>2</sub> as balance), and the turbine by means of a 3-l syringe. Beat-by-beat heart rate (HR) was continuously monitored by cardiotelemetry (Polar RS 800 CX, Polar, Finland). Gas exchange variables ( $\dot{V}O_2$ ,  $\dot{V}CO_2$ ,  $\dot{V}E$ , and RER) were continuously recorded on a breath-by-breath basis and later averaged over 10s sliding intervals for further analysis. The initial

power output was 50W for 4min, followed by increases of 25W each 2min until achievement of 80% of maximal HR predicted by age, then 25W increments each 1min until volitional exhaustion. The criteria for  $\dot{V}O_2\text{max}$  were  $\text{RER} > 1.1$ , plateau in  $\dot{V}O_2$  (change of  $<100\text{ml/min}$  in the last three consecutive 20-s averages), and a HR within 10 beats/min of the maximal level predicted by age. Results of this test (see **Supplementary Figure 4** for  $\dot{V}O_2\text{max}$  distribution) were used to select power output for subsequent constant tests, based on the relationship between  $\dot{V}O_2$  and power output.

**Blood samples:** Overall twelve ml of blood were collected before and after the rest or exercise periods. Seven ml of blood were collected into a BD Vacutainer clot-activator tube (CAT), allowed to clot for 30 minutes at room temperature and centrifuged at 1100g for 15 minutes at 4°C. Serum was collected from the supernatant in aliquots of 200 $\mu\text{l}$  and frozen at -80°C until analysis. The other 5ml of blood were collected into a BD Vacutainer K<sub>2</sub>EDTA 5.4mg tube and centrifuged immediately at 8009g for 10 min. Plasma was collected from the supernatant in aliquots of 200 $\mu\text{l}$  frozen at -80°C until analysis. All samples were centrifuged in a Heraeus Biofuge Stratos (ThermoFisher) centrifuge. The Quantikine ELISA Human Free BDNF kits (R&D systems) were used to quantify serum BDNF via an enzyme-linked immunosorbent assay (ELISA) following the manufacturer's instructions.

AEA and 2-AG were extracted from 100 $\mu\text{l}$  of plasma by liquid-liquid extraction, and then separated by liquid chromatography (Ultimate 3000RS, Dionex, CA, USA). Analyses were performed on a 5500 QTrap® triple quadrupole/linear ion trap (QqQLIT) mass spectrometer equipped with a Turbolon-Spray™ interface (AB Sciex, Concord, ON, Canada) as described previously<sup>76, 77</sup>.

## Behavioral analysis

All behavioral analyses were performed using Statistica (Version 12, [www.statsoft.com](http://www.statsoft.com), StatSoft, Inc. TULSA, OK, USA). Repeated-measures ANOVAs were performed and Neuman-Keuls post-hoc comparison methods were used. Correlations were performed using the Pearson's R. Non parametric tests were used when normal distribution or equal variance criteria were not met.

## **Functional MRI data acquisition and analysis**

MRI data were acquired on a 3 Tesla MRI scanner (SIEMENS Trio® System, Siemens, Erlangen, Germany) with a 32-channel head coil. T2\*-weighted fMRI 2D images were obtained with a multiband gradient echo-planar sequence acquiring 3 slices at a time using axial slice orientation (66 slices; voxel size, 2 x 2 x 2mm; repetition time (TR) = 1880ms; echo time (TE) = 34ms; flip angle (FA) = 60°). A whole-brain structural image was acquired at the end of the first test part with a T1-weighted 3D sequence (192 contiguous sagittal slices; voxel size, 1.0 x 1.0 x 1.0mm; TR = 1900ms; TE = 2.27ms; FA = 9°).

**Conventional fMRI analysis:** Functional images were analyzed using SPM12 (Wellcome Department of Imaging Neuroscience, London, UK). This analysis included standard preprocessing procedures: realignment, slice timing to correct for differences in slice acquisition time, normalization (images were normalized to an MNI template), and smoothing (with an isotropic 8-mm FWHM Gaussian kernel) – except for the decoding analysis where we used unsmoothed images (see below). While scanning was not performed right after physical exercise or rest, but about 1h later, we nevertheless performed corrections to regress out potential physiological artifacts from heart rate and breathing using Retroicor<sup>70</sup> and RVHcorr<sup>71, 72</sup>, respectively. A general linear model (GLM) approach was then used to compare

conditions of interest at the individual level, each individual GLM included correct trials separated according to Relational Distance (Direct, Inference 1, Inference 2 trials), control trials and missed trials (pooled across Relational Distance), plus 6 movement regressors, 5 heart rate regressors and 1 breathing regressor as regressors of non-interest. Then, contrasts between conditions of interest from each participant were entered a second-level random-effects analysis. All activations are reported at  $p < 0.001$  with a cluster size of 10 voxels and relevant regions, especially the hippocampus, survived small-volume correction (SVC) for familywise error ( $p < 0.05$ ) using volumes based on the Anatomy toolbox of SPM12 (SPM Anatomy toolbox 2.2, Forschungszentrum Jülich GmbH). Coordinates of brain regions are reported in MNI space.

**Psychophysiological Interaction analysis:** Psychophysiological interaction (PPI) analysis was computed to test the hypothesis that functional connectivity between a seed region and the rest of the brain differed according to Exercising Condition during the retest session. Therefore, we took as psychological factor the contrast between Moderate intensity exercise and Rest, irrespective of trial type (direct, inference 1 and inference 2 trials). A new linear model was prepared for PPI analyses at the individual level, using three regressors. The first regressor represented the psychological factor, composed of moderate intensity exercise vs rest hits. The second regressor was the activity in the seed region. The third regressor represented the interaction of interest between the first (psychological) and the second (physiological) regressor. To build this regressor, the underlying neuronal activity was first estimated by a parametric empirical Bayes formulation, combined with the psychological factor and subsequently convolved with the hemodynamic response function<sup>78</sup>. The model also included movement parameters. A significant

psychophysiological interaction indicated a change in the regression coefficients between any reported brain area and the reference region, related to the correct retrieval after moderate intensity exercise versus after rest trials. Next, individual summary statistic images obtained at the first-level (fixed-effects) analysis were spatially smoothed (6mm FWHM Gaussian kernel) and entered a second-level (random-effects) analysis using ANOVAs to compare the functional connectivity between groups.

**Decoding analysis:** A decoding procedure was performed on unsmoothed data. For each session of each participant, the timeseries of all voxels within the bilateral hippocampus region of interest, which was defined in the Anatomy toolbox as the union of CA1, CA2, CA3 and DG regions, were extracted. Timeseries were detrended and demeaned, then the movement parameters obtained from realignment and breathing parameters from retroicor and RVHcorr were regressed out. As Van Dongen et al.<sup>38</sup>, we included correct, incorrect and control trials in the analysis. Estimates of the BOLD response for each single trial were then computed to obtain a “voxel by trial matrix”, from which the mean BOLD response for each type of trial (correct, incorrect, and control) was computed per voxel. Decoding accuracy was obtained by first applying a leave one out procedure, computing a mean “voxel by trial type matrix” for all participants but one. A standard cross-validation procedure was then performed for each trial of the left out participant and it was classified as a trial type where the highest Pearson R correlation was found. Overall, we obtained percentages of trials classified as correct trials, incorrect trials, and control trials for each trial type, which were used for statistical analysis of sensitivity (true positive rate) and specificity (true negative rate). To assess whether there was a laterality

effect in the hippocampus, we subsequently ran analyses using the left and right hippocampus as separate regions of interest (see **Supplementary Figure 3**).

### **Data and code availability**

The data that supports these findings and the custom code used in this study are available from the corresponding author upon reasonable request.

### **Acknowledgements**

We are grateful to the Brain and Behaviour Laboratory of the University of Geneva (Geneva, Switzerland) for providing help and scanning facilities. We thank Emrah Duezel for useful comments on this manuscript.

### **Disclosures**

This work was supported by the Swiss National Science Foundation (No 320030\_135653 to S. Schwartz, 32003B\_127620 and 3200B0-114033 to G. Ferretti), the National Center of Competence in Research (NCCR) Affective Sciences financed by the Swiss National Science Foundation (No 51NF40-104897 to S. Schwartz). No conflicts of interest, financial or otherwise, are declared by the authors.

### **Competing interests**

The authors declare no competing interests.

### **Author contributions**

B.M.B, A.B, G.F., S.S. and K.I. designed research; B.M.B, A.B., M.G.L., N.I. and K.I performed research; B.M.B., A.B., M.G.L., E.L., A.T., S.S. and K.I. analyzed data; and all the authors wrote the paper.

# 1 Figures

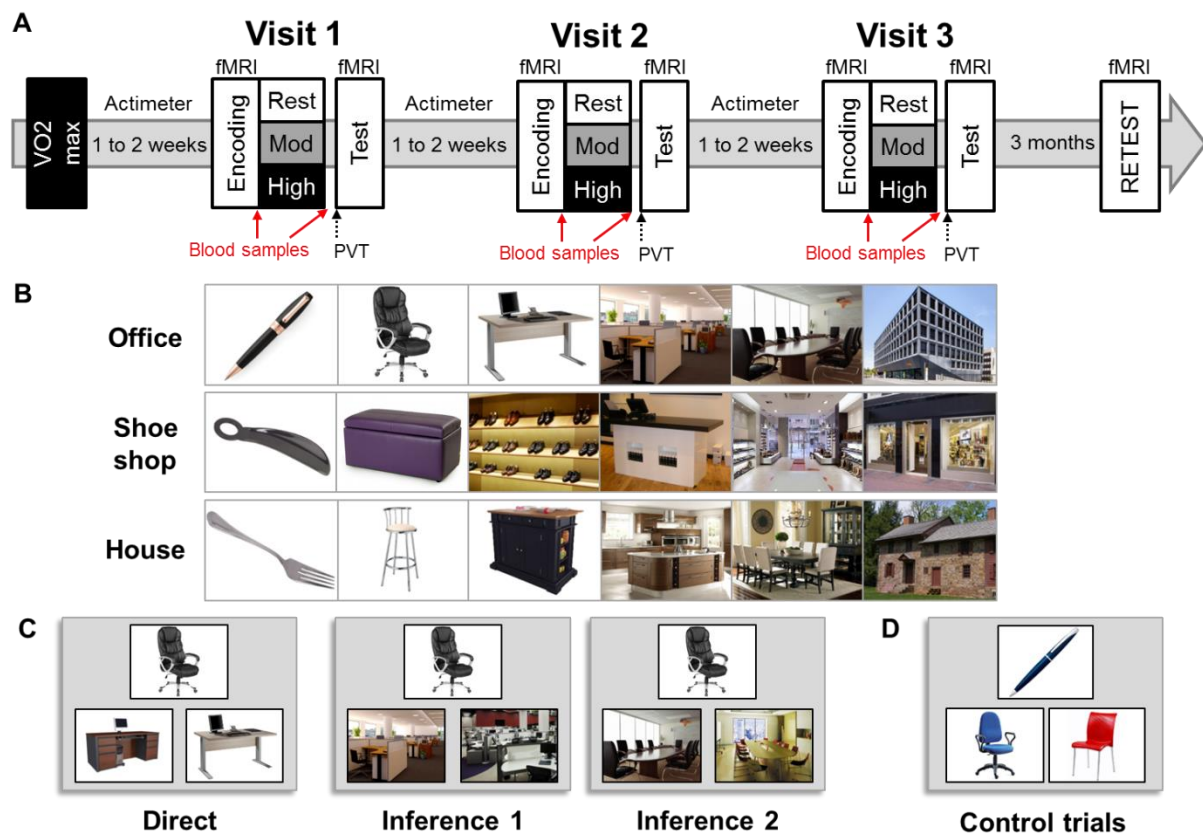

**Figure 1 - Experimental design**

**A)** Overview of the experimental protocol composed of five visits: three experimental visits preceded by a VO2max visit and a retest visit performed three months after the last experimental visit. All experimental visits started at 9AM and were composed of two MRI sessions (encoding and test) separated by a physical exercise or rest session. Physical exercise was either of moderate intensity (30 minutes cycling at 60% of FcMax) or of high intensity (15 minutes cycling at 75% of FcMax). Blood samples were taken twice at each experimental visit, before and after exercise or rest. PVT and POMS questionnaire were administered after exercise or rest. **B)** Examples of series of pictures for each theme (upper line: office, middle line: shoe shop, lower line: house). **C)** Examples of direct trials (left), inference of order 1 (middle) and 2 trials (right). Direct trials were used during the learning, test, and retest sessions, inferences 1 and 2 trials were used during test and retest sessions. **D)** Example of control trials.

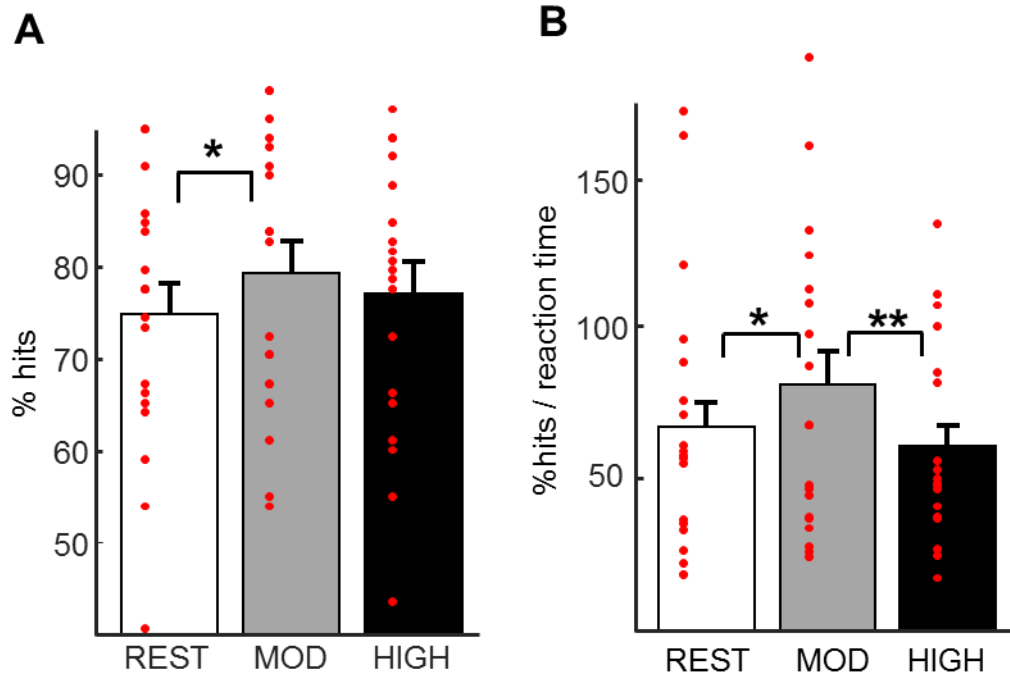

**Figure 2 - Better performance after moderate intensity exercise at test**

**A)** Hit rate: Higher hit rate after moderate intensity exercise than after rest. **B)** Efficiency: Better efficiency (%hits / reaction time) after moderate intensity exercise than after rest and high intensity exercise.

On all bar plots we represent mean  $\pm$  SEM; additional red dots represent individual data points.

\*:  $p < 0.05$ , \*\*:  $p < 0.01$ , \*\*\*:  $p < 0.001$



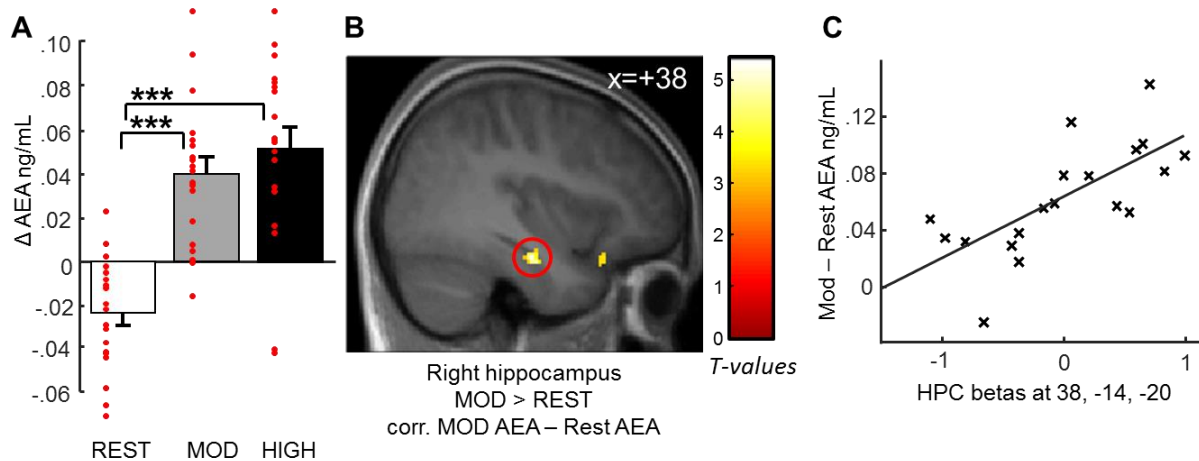

**Figure 3 - Increased anandamide levels correlate with hippocampal activation after moderate intensity exercise**

**A)** Increased Anandamide level (AEA) after moderate and high physical exercise compared to rest. For all Exercising Conditions  $\Delta$  AEA corresponds to the difference in AEA between the second blood sample taken after exercise or rest and the first blood sample taken before exercise or rest. **B)** Increased right hippocampal response [z-score=3.89 (38, -14, -20),  $p < 0.05$  SVC] for hits after moderate exercise compared to hits after rest correlated with the increase in anandamide level after moderate exercise. **C)** Correlation of the hippocampal beta values with increase in anandamide. Activation map displayed on the mean T1 anatomical scan of the whole population. For display purposes, hippocampal activations are thresholded at  $p < 0.005$ .

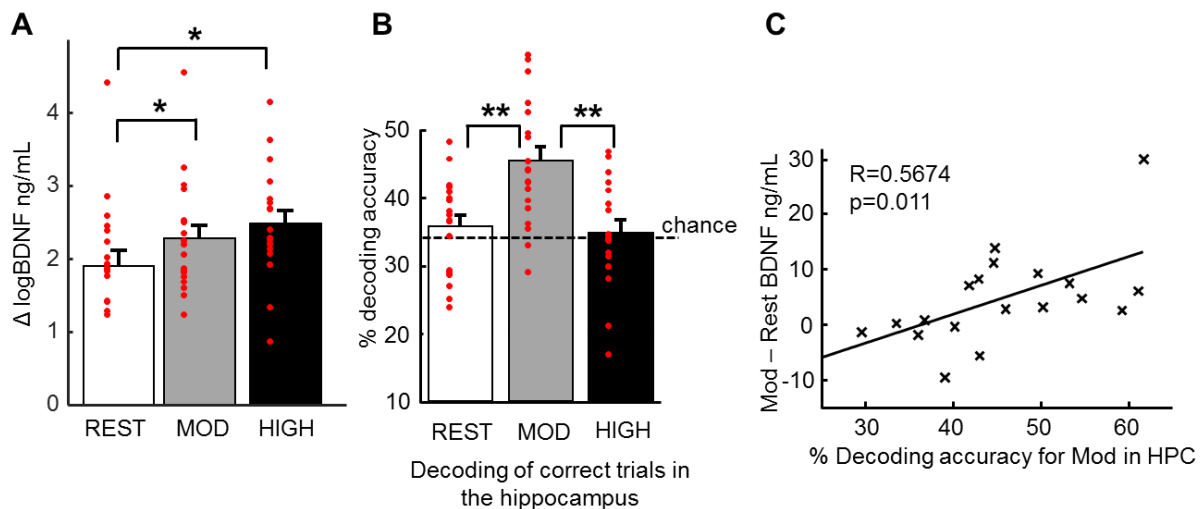

**Figure 4 - Increased BDNF levels correlate with decoding accuracy in the hippocampus after moderate physical exercise**

**A)** Increased BDNF levels after moderate and high intensity exercise compared to after rest. For all Exercising Conditions  $\Delta$  BDNF corresponds to the difference in BDNF between the second blood sample taken after exercise or rest and the first blood sample taken before exercise or rest. For display purposes, we represent  $\Delta \log \text{BDNF}$ . **B)** Better sensitivity of decoding accuracy of correct trials in the bilateral hippocampus after moderate exercise than rest and high intensity exercise. **C)** Positive correlation between decoding accuracy in the hippocampus and increase in BDNF level after moderate intensity exercise.

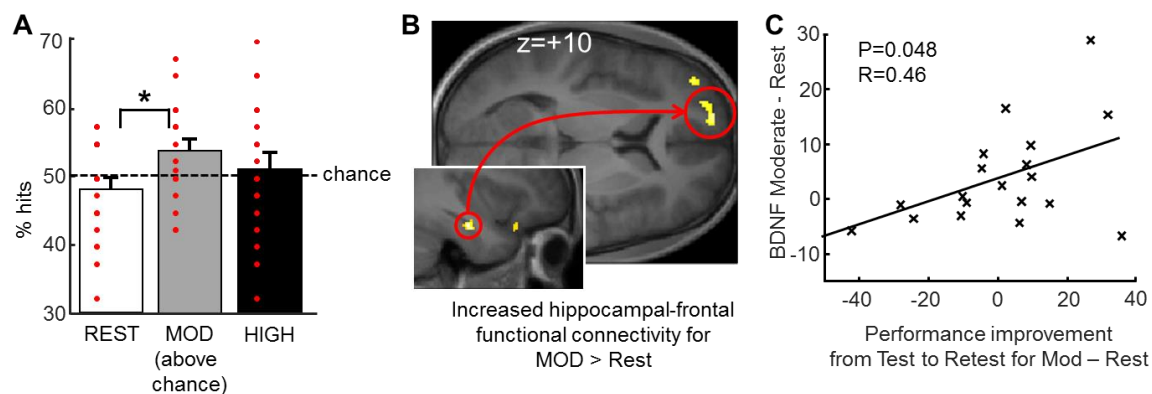

**Figure 5 - Better long-term memory for associations learnt after moderate physical exercise, related to prefrontal activation and BDNF signaling**

**A)** Better performance for pictures learnt during the moderate intensity visit than for pictures learnt during the resting visit. Performance after moderate exercise is significantly above chance level. **B)** PPI for the retest session, using the seed in the left hippocampus from Figure 3B. Increased functional coupling with the left superior frontal gyrus [z-score=3.16 (-16, 62, 6),  $p < 0.05$ ], selectively after moderate exercise compared to after rest. **C)** Performance improvement from test to retest for moderate exercise compared to Rest correlates with BDNF enhancement from moderate exercise to rest.

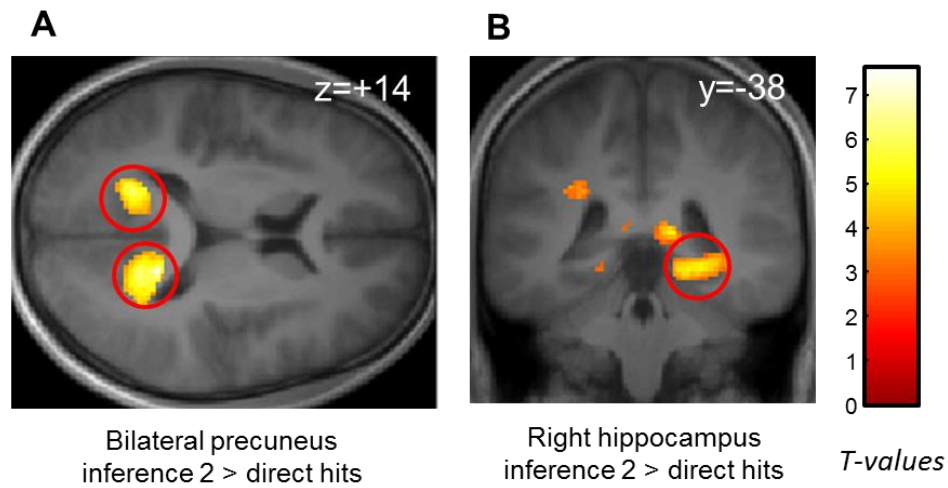

## Supplementary Figure 1 - Brain correlates of increasing Relational Distance

**A)** Bilateral precuneus activation for increasing Relational Distance (inference 2 hits > direct hits). **B)** Right hippocampal activation for increasing Relational Distance (inference 2 hits > direct hits) [z score=3.64 (18, -38, -8),  $p<0.05$  SVC].

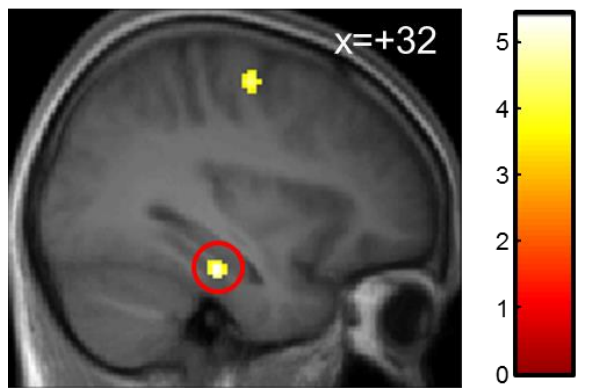

Right hippocampus  
HIGH > REST  
corr. HIGH AEA – Rest AEA

*T-values*

## Supplementary Figure 2 - Hippocampal response correlated with endocannabinoid increase after high intensity exercise

Increased right parahippocampal (extending into hippocampus) response [z-score=3.41 (32, -22, -20),  $p < 0.05$  SVC] for hits after high intensity exercise compared to hits after rest correlated with the increase in anandamide level after high intensity exercise.

Activation map displayed on the mean T1 anatomical scan of the whole population.

For display purposes, hippocampal activations are thresholded at  $p < 0.005$ .

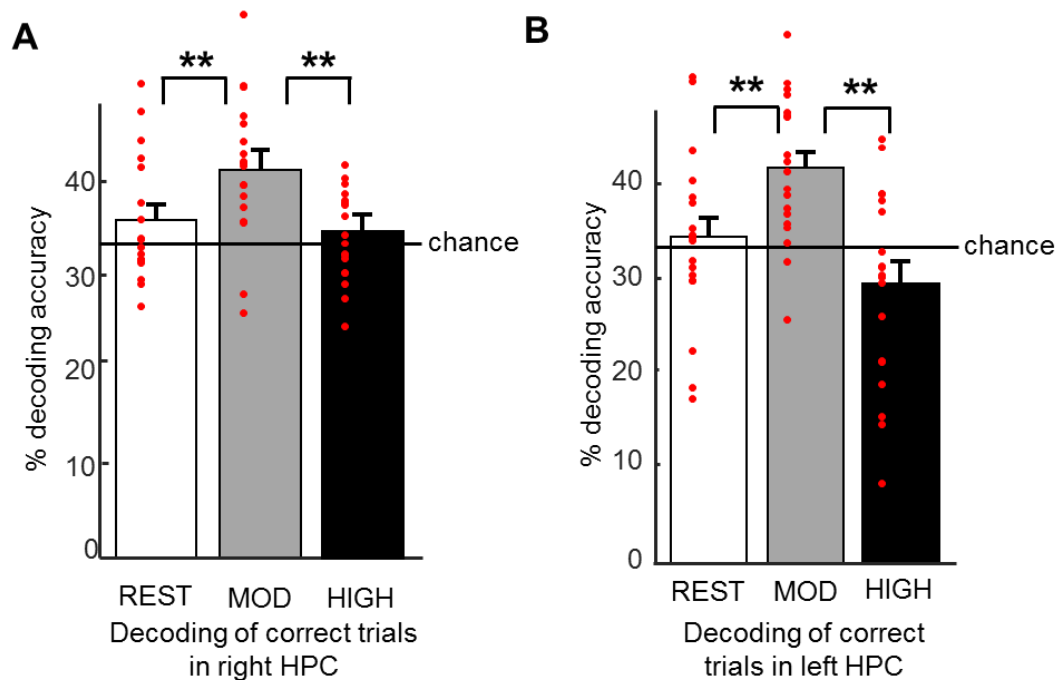

### Supplementary Figure 3 – Better decoding accuracy in both left and right hippocampi after moderate intensity exercise

**A)** Better sensitivity of decoding of correct trials in the right hippocampus after moderate exercise than rest and high intensity exercise. ANOVA  $F(2, 36)=8.40$ ,  $p=0.001$ , post-hoc  $p_{\text{mod-rest}}=0.048$   $p_{\text{mod-high}}<0.001$ . **B)** Better sensitivity of decoding of correct trials in the left hippocampus after moderate exercise than rest and high intensity exercise. ANOVA  $F(2, 36)=6.79$ ,  $p=0.003$ , post-hoc  $p_{\text{mod-rest}}=0.002$   $p_{\text{mod-high}}=0.004$ .

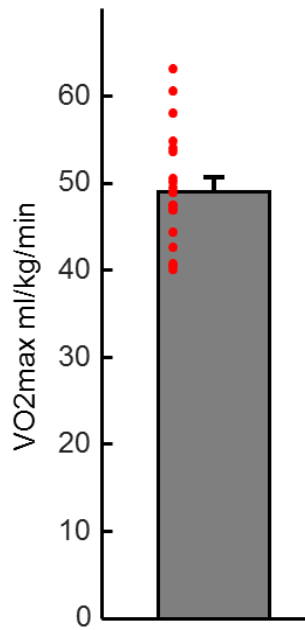

**Supplementary Figure 4 – Distribution of VO2max measures**

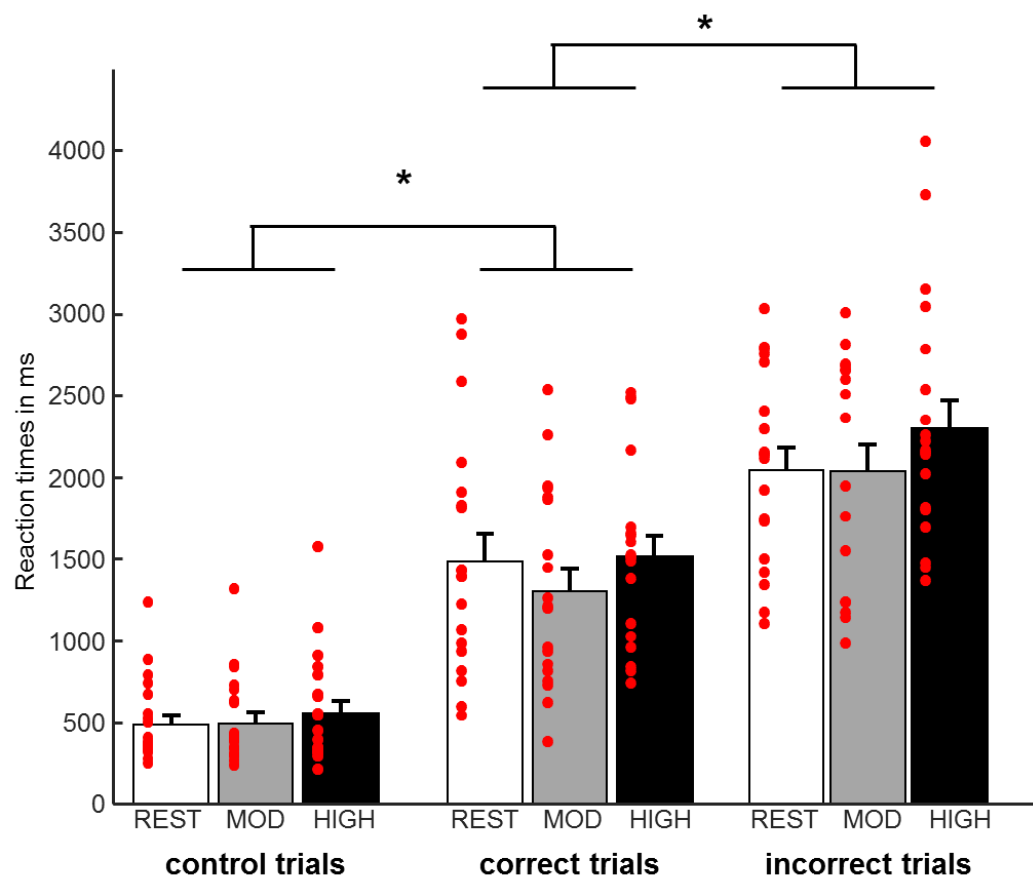

**Supplementary Figure 5 – Reaction times during Test by Trial type (control, correct and incorrect trails) and Exercising Condition.**



| Brain Region                                                              | Lat.         | cluster size | unc. p-value   | SVC p-value  | peak T      | peak Z      | X         | Y          | Z          |
|---------------------------------------------------------------------------|--------------|--------------|----------------|--------------|-------------|-------------|-----------|------------|------------|
| <b>Increasing relational distance (inference 2 hits &gt; direct hits)</b> |              |              |                |              |             |             |           |            |            |
| Precuneus                                                                 | Right        | 614          | 1.8E-07        |              | 7.59        | 5.09        | 16        | -46        | 14         |
| Precuneus                                                                 | Left         | 480          | 5.9E-05        |              | 4.82        | 3.85        | -20       | -48        | -4         |
| <b>Hippocampus</b>                                                        | <b>Right</b> | <b>203</b>   | <b>6.3E-06</b> | <b>0.017</b> | <b>4.37</b> | <b>4.37</b> | <b>18</b> | <b>-38</b> | <b>-8</b>  |
| Subiculum                                                                 | Right        | 21           | 1.4E-04        | 0.001        | 3.64        | 3.64        | 26        | -28        | -20        |
| Lingual gyrus                                                             | Right        | 49           | 8.8E-05        |              | 3.75        | 3.75        | 16        | -82        | -6         |
| Occipital gyrus                                                           | Right        | 39           | 1.6E-04        |              | 3.60        | 3.60        | -12       | -92        | 0          |
| <b>moderate intensity exercise &gt; rest corr. with changes in AEA</b>    |              |              |                |              |             |             |           |            |            |
| <b>Hippocampus</b>                                                        | <b>Right</b> | <b>13</b>    | <b>5E-05</b>   | <b>0,008</b> | <b>5.36</b> | <b>3.89</b> | <b>38</b> | <b>-14</b> | <b>-20</b> |
| <b>high intensity exercise &gt; rest corr. with changes in AEA</b>        |              |              |                |              |             |             |           |            |            |
| Parahippocampus                                                           | Right        | 13           | 1.7E-04        |              | 4.70        | 3.58        | 34        | -24        | -22        |
| <b>Hippocampus (extending from parahippocampus)</b>                       | <b>Right</b> |              |                | <b>0,039</b> |             |             | <b>32</b> | <b>-22</b> | <b>-20</b> |
| Middle Occipital Gyrus                                                    | Right        | 11           | 3.4E-04        |              | 4.34        | 3.40        | 42        | -76        | 34         |
| <b>Retest PPI moderate &gt; rest</b>                                      |              |              |                |              |             |             |           |            |            |
| Inferior Frontal Gyrus                                                    | Right        | 52           | 7.7E-04        |              | 3.72        | 3.16        | -16       | 62         | 6          |

1

2 **Table 1 - Activation tables**

# References

1. Roig M, Nordbrandt S, Geertsen SS, Nielsen JB. The effects of cardiovascular exercise on human memory: a review with meta-analysis. *Neuroscience and biobehavioral reviews* **37**, 1645-1666 (2013).
2. Lautenschlager NT, *et al.* Effect of physical activity on cognitive function in older adults at risk for Alzheimer disease: a randomized trial. *Jama* **300**, 1027-1037 (2008).
3. Uysal N, *et al.* The effects of regular aerobic exercise in adolescent period on hippocampal neuron density, apoptosis and spatial memory. *Neurosci Lett* **383**, 241-245 (2005).
4. Wu CW, *et al.* Treadmill exercise counteracts the suppressive effects of peripheral lipopolysaccharide on hippocampal neurogenesis and learning and memory. *J Neurochem* **103**, 2471-2481 (2007).
5. Erickson KI, *et al.* Exercise training increases size of hippocampus and improves memory. *Proc Natl Acad Sci U S A* **108**, 3017-3022 (2011).
6. Pereira AC, *et al.* An in vivo correlate of exercise-induced neurogenesis in the adult dentate gyrus. *Proc Natl Acad Sci U S A* **104**, 5638-5643 (2007).
7. Eriksson PS, *et al.* Neurogenesis in the adult human hippocampus. *Nature medicine* **4**, 1313-1317 (1998).
8. Boldrini M, *et al.* Human Hippocampal Neurogenesis Persists throughout Aging. *Cell Stem Cell* **22**, 589-599.e585.
9. Sorrells SF, *et al.* Human hippocampal neurogenesis drops sharply in children to undetectable levels in adults. *Nature* **555**, 377-381 (2018).
10. Vaynman S, Ying Z, Gomez-Pinilla F. Interplay between brain-derived neurotrophic factor and signal transduction modulators in the regulation of the effects of exercise on synaptic-plasticity. *Neuroscience* **122**, 647-657 (2003).
11. Bekinschtein P, Oomen CA, Saksida LM, Bussey TJ. Effects of environmental enrichment and voluntary exercise on neurogenesis, learning and memory, and pattern separation: BDNF as a critical variable? *Semin Cell Dev Biol* **22**, 536-542 (2011).
12. Alomari MA, Khabour OF, Alzoubi KH, Alzubi MA. Forced and voluntary exercises equally improve spatial learning and memory and hippocampal BDNF levels. *Behav Brain Res* **247**, 34-39 (2013).

13. Soya H, *et al.* BDNF induction with mild exercise in the rat hippocampus. *Biochem Biophys Res Commun* **358**, 961-967 (2007).
14. Cotman CW, Berchtold NC. Exercise: a behavioral intervention to enhance brain health and plasticity. *Trends Neurosci* **25**, 295-301 (2002).
15. Neeper SA, Gomez-Pinilla F, Choi J, Cotman C. Exercise and brain neurotrophins. *Nature* **373**, 109 (1995).
16. Vaynman S, Ying Z, Gomez-Pinilla F. Hippocampal BDNF mediates the efficacy of exercise on synaptic plasticity and cognition. *Eur J Neurosci* **20**, 2580-2590 (2004).
17. Berg U, Bang P. Exercise and circulating insulin-like growth factor I. *Hormone research* **62 Suppl 1**, 50-58 (2004).
18. Rojas Vega S, Struder HK, Vera Wahrmann B, Schmidt A, Bloch W, Hollmann W. Acute BDNF and cortisol response to low intensity exercise and following ramp incremental exercise to exhaustion in humans. *Brain Res* **1121**, 59-65 (2006).
19. Korte M, *et al.* Virus-mediated gene transfer into hippocampal CA1 region restores long-term potentiation in brain-derived neurotrophic factor mutant mice. *Proc Natl Acad Sci U S A* **93**, 12547-12552 (1996).
20. Liu HL, Zhao G, Cai K, Zhao HH, Shi LD. Treadmill exercise prevents decline in spatial learning and memory in APP/PS1 transgenic mice through improvement of hippocampal long-term potentiation. *Behav Brain Res* **218**, 308-314 (2011).
21. Farmer J, Zhao X, van Praag H, Wodtke K, Gage FH, Christie BR. Effects of voluntary exercise on synaptic plasticity and gene expression in the dentate gyrus of adult male Sprague-Dawley rats in vivo. *Neuroscience* **124**, 71-79 (2004).
22. van Praag H, Christie BR, Sejnowski TJ, Gage FH. Running enhances neurogenesis, learning, and long-term potentiation in mice. *Proc Natl Acad Sci U S A* **96**, 13427-13431 (1999).
23. Dietrich MO, Andrews ZB, Horvath TL. Exercise-induced synaptogenesis in the hippocampus is dependent on UCP2-regulated mitochondrial adaptation. *J Neurosci* **28**, 10766-10771 (2008).
24. Stranahan AM, Khalil D, Gould E. Running induces widespread structural alterations in the hippocampus and entorhinal cortex. *Hippocampus* **17**, 1017-1022 (2007).
25. van Praag H. Exercise and the brain: something to chew on. *Trends Neurosci* **32**, 283-290 (2009).

26. Dietrich A, McDaniel WF. Endocannabinoids and exercise. *Br J Sports Med* **38**, 536-541 (2004).
27. Sparling PB, Giuffrida A, Piomelli D, Roskopf L, Dietrich A. Exercise activates the endocannabinoid system. *Neuroreport* **14**, 2209-2211 (2003).
28. Raichlen DA, Foster AD, Gerdeman GL, Seillier A, Giuffrida A. Wired to run: exercise-induced endocannabinoid signaling in humans and cursorial mammals with implications for the 'runner's high'. *J Exp Biol* **215**, 1331-1336 (2012).
29. Raichlen DA, Foster AD, Seillier A, Giuffrida A, Gerdeman GL. Exercise-induced endocannabinoid signaling is modulated by intensity. *Eur J Appl Physiol* **113**, 869-875 (2013).
30. Dubreucq S, Koehl M, Abrous DN, Marsicano G, Chaouloff F. CB1 receptor deficiency decreases wheel-running activity: consequences on emotional behaviours and hippocampal neurogenesis. *Exp Neurol* **224**, 106-113 (2010).
31. Hill MN, *et al.* Endogenous cannabinoid signaling is required for voluntary exercise-induced enhancement of progenitor cell proliferation in the hippocampus. *Hippocampus* **20**, 513-523 (2010).
32. Chevalleyre V, Takahashi KA, Castillo PE. Endocannabinoid-mediated synaptic plasticity in the CNS. *Annu Rev Neurosci* **29**, 37-76 (2006).
33. Katona I, Freund TF. Multiple functions of endocannabinoid signaling in the brain. *Annu Rev Neurosci* **35**, 529-558 (2012).
34. Gomez-Gonzalo M, *et al.* Endocannabinoids Induce Lateral Long-Term Potentiation of Transmitter Release by Stimulation of Gliotransmission. *Cerebral cortex* **25**, 3699-3712 (2015).
35. Andero R, Ressler KJ. Fear extinction and BDNF: translating animal models of PTSD to the clinic. *Genes Brain Behav* **11**, 503-512 (2012).
36. Talani G, *et al.* Enhanced Glutamatergic Synaptic Plasticity in the Hippocampal CA1 Field of Food-Restricted Rats: Involvement of CB1 Receptors. *Neuropsychopharmacology : official publication of the American College of Neuropsychopharmacology* **41**, 1308-1318 (2016).
37. Ferreira-Vieira TH, Bastos CP, Pereira GS, Moreira FA, Massensini AR. A role for the endocannabinoid system in exercise-induced spatial memory enhancement in mice. *Hippocampus* **24**, 79-88 (2014).

38. van Dongen EV, Kersten IH, Wagner IC, Morris RG, Fernandez G. Physical Exercise Performed Four Hours after Learning Improves Memory Retention and Increases Hippocampal Pattern Similarity during Retrieval. *Current biology : CB* **26**, 1722-1727 (2016).
39. Chang YK, Labban JD, Gapin JI, Etnier JL. The effects of acute exercise on cognitive performance: a meta-analysis. *Brain Res* **1453**, 87-101 (2012).
40. Tomporowski PD. Effects of acute bouts of exercise on cognition. *Acta Psychol (Amst)* **112**, 297-324 (2003).
41. Marin Bosch B, Bringard A, Ferretti G, Schwartz S, Igloi K. Effect of cerebral vasomotion during physical exercise on associative memory, a near-infrared spectroscopy study. *Neurophotonics* **4**, 041404 (2017).
42. Basso JC, Shang A, Elman M, Karmouta R, Suzuki WA. Acute Exercise Improves Prefrontal Cortex but not Hippocampal Function in Healthy Adults. *Journal of the International Neuropsychological Society : JINS* **21**, 791-801 (2015).
43. Igloi K, Gaggioni G, Sterpenich V, Schwartz S. A nap to recap or how reward regulates hippocampal-prefrontal memory networks during daytime sleep in humans. *eLife* **4**, (2015).
44. Labar G, Michaux C. Fatty acid amide hydrolase: from characterization to therapeutics. *Chemistry & biodiversity* **4**, 1882-1902 (2007).
45. Vaughn LK, Denning G, Stuhr KL, de Wit H, Hill MN, Hillard CJ. Endocannabinoid signalling: has it got rhythm? *British journal of pharmacology* **160**, 530-543 (2010).
46. Dinges DF, et al. Cumulative sleepiness, mood disturbance, and psychomotor vigilance performance decrements during a week of sleep restricted to 4-5 hours per night. *Sleep* **20**, 267-277 (1997).
47. Fuss J, et al. A runner's high depends on cannabinoid receptors in mice. *Proc Natl Acad Sci U S A* **112**, 13105-13108 (2015).
48. Molteni R, Ying Z, Gomez-Pinilla F. Differential effects of acute and chronic exercise on plasticity-related genes in the rat hippocampus revealed by microarray. *Eur J Neurosci* **16**, 1107-1116 (2002).
49. Bliss TV, Lomo T. Long-lasting potentiation of synaptic transmission in the dentate area of the anaesthetized rabbit following stimulation of the perforant path. *The Journal of physiology* **232**, 331-356 (1973).

50. Mei F, Nagappan G, Ke Y, Sacktor TC, Lu B. BDNF facilitates L-LTP maintenance in the absence of protein synthesis through PKMzeta. *PloS one* **6**, e21568 (2011).
51. Rex CS, Lin CY, Kramar EA, Chen LY, Gall CM, Lynch G. Brain-derived neurotrophic factor promotes long-term potentiation-related cytoskeletal changes in adult hippocampus. *J Neurosci* **27**, 3017-3029 (2007).
52. Bekinschtein P, Cammarota M, Igaz LM, Bevilacqua LR, Izquierdo I, Medina JH. Persistence of long-term memory storage requires a late protein synthesis- and BDNF- dependent phase in the hippocampus. *Neuron* **53**, 261-277 (2007).
53. Levine ES, Crozier RA, Black IB, Plummer MR. Brain-derived neurotrophic factor modulates hippocampal synaptic transmission by increasing N-methyl-D-aspartic acid receptor activity. *Proc Natl Acad Sci U S A* **95**, 10235-10239 (1998).
54. Rondi-Reig L, Petit GH, Tobin C, Tonegawa S, Mariani J, Berthoz A. Impaired sequential egocentric and allocentric memories in forebrain-specific-NMDA receptor knock-out mice during a new task dissociating strategies of navigation. *J Neurosci* **26**, 4071-4081 (2006).
55. Tsien JZ, Huerta PT, Tonegawa S. The essential role of hippocampal CA1 NMDA receptor-dependent synaptic plasticity in spatial memory. *Cell* **87**, 1327-1338 (1996).
56. Jackson MB. Recall of spatial patterns stored in a hippocampal slice by long-term potentiation. *Journal of neurophysiology* **110**, 2511-2519 (2013).
57. Svedahl K, MacIntosh BR. Anaerobic threshold: the concept and methods of measurement. *Canadian journal of applied physiology = Revue canadienne de physiologie appliquee* **28**, 299-323 (2003).
58. ten Brinke LF, et al. Aerobic exercise increases hippocampal volume in older women with probable mild cognitive impairment: a 6-month randomised controlled trial. *Br J Sports Med* **49**, 248-254 (2015).
59. Hill EE, Zack E, Battaglini C, Viru M, Viru A, Hackney AC. Exercise and circulating cortisol levels: the intensity threshold effect. *Journal of endocrinological investigation* **31**, 587-591 (2008).
60. Het S, Ramlow G, Wolf OT. A meta-analytic review of the effects of acute cortisol administration on human memory. *Psychoneuroendocrinology* **30**, 771-784 (2005).
61. Szuhany KL, Bugatti M, Otto MW. A meta-analytic review of the effects of exercise on brain-derived neurotrophic factor. *Journal of psychiatric research* **60**, 56-64 (2015).

62. Armstrong ME, Green J, Reeves GK, Beral V, Cairns BJ, Million Women Study C. Frequent physical activity may not reduce vascular disease risk as much as moderate activity: large prospective study of women in the United Kingdom. *Circulation* **131**, 721-729 (2015).
63. Lucas SJ, Cotter JD, Brassard P, Bailey DM. High-intensity interval exercise and cerebrovascular health: curiosity, cause, and consequence. *Journal of cerebral blood flow and metabolism : official journal of the International Society of Cerebral Blood Flow and Metabolism* **35**, 902-911 (2015).
64. Schmidt W, Endres M, Dimeo F, Jungehulsing GJ. Train the vessel, gain the brain: physical activity and vessel function and the impact on stroke prevention and outcome in cerebrovascular disease. *Cerebrovascular diseases* **35**, 303-312 (2013).
65. Norton S, Matthews FE, Barnes DE, Yaffe K, Brayne C. Potential for primary prevention of Alzheimer's disease: an analysis of population-based data. *The Lancet Neurology* **13**, 788-794 (2014).
66. Mamounas LA, Altar CA, Blue ME, Kaplan DR, Tessarollo L, Lyons WE. BDNF promotes the regenerative sprouting, but not survival, of injured serotonergic axons in the adult rat brain. *J Neurosci* **20**, 771-782 (2000).
67. Moreira FA, Aguiar DC, Guimaraes FS. Anxiolytic-like effect of cannabinoids injected into the rat dorsolateral periaqueductal gray. *Neuropharmacology* **52**, 958-965 (2007).
68. Ahlskog JE, Geda YE, Graff-Radford NR, Petersen RC. Physical exercise as a preventive or disease-modifying treatment of dementia and brain aging. *Mayo Clin Proc* **86**, 876-884 (2011).
69. Duzel E, van Praag H, Sendtner M. Can physical exercise in old age improve memory and hippocampal function? *Brain : a journal of neurology* **139**, 662-673 (2016).
70. Glover GH, Li TQ, Ress D. Image-based method for retrospective correction of physiological motion effects in fMRI: RETROICOR. *Magnetic resonance in medicine* **44**, 162-167 (2000).
71. Birn RM, Diamond JB, Smith MA, Bandettini PA. Separating respiratory-variation-related fluctuations from neuronal-activity-related fluctuations in fMRI. *Neuroimage* **31**, 1536-1548 (2006).
72. Birn RM, Smith MA, Jones TB, Bandettini PA. The respiration response function: the temporal dynamics of fMRI signal fluctuations related to changes in respiration. *Neuroimage* **40**, 644-654 (2008).



73. Steer RA, Ball R, Ranieri WF, Beck AT. Further evidence for the construct validity of the Beck depression Inventory-II with psychiatric outpatients. *Psychological reports* **80**, 443-446 (1997).
74. Spielberger CD, Gorsuch RL, Lushene R, Vagg PR, Jacobs GA. *Manual for the State-Trait Anxiety Inventory* (1983).
75. Horne JA, Ostberg O. A self-assessment questionnaire to determine morningness-eveningness in human circadian rhythms. *International journal of chronobiology* **4**, 97-110 (1976).
76. Quercioli A, *et al.* Improvement in coronary circulatory function in morbidly obese individuals after gastric bypass-induced weight loss: relation to alterations in endocannabinoids and adipocytokines. *European heart journal* **34**, 2063-2073 (2013).
77. Thomas A, Hopfgartner G, Giroud C, Staub C. Quantitative and qualitative profiling of endocannabinoids in human plasma using a triple quadrupole linear ion trap mass spectrometer with liquid chromatography. *Rapid communications in mass spectrometry : RCM* **23**, 629-638 (2009).
78. Gitelman DR, Penny WD, Ashburner J, Friston KJ. Modeling regional and psychophysiologic interactions in fMRI: the importance of hemodynamic deconvolution. *Neuroimage* **19**, 200-207 (2003).
